# Supplementary material for: Unusual strain effect of a Pt-based L10 face-centered tetragonal core in core/shell nanoparticles for the oxygen reduction reaction
Source: Royal Society of Chemistry journal article supplement (doi:10.1039/c8cp06756b), 2019-01-01

Supporting Information  
for  
Unusual Strain Effect of Pt-Based Face-Centered Tetragonal Core in Core/Shell  
Nanoparticles for Oxygen Reduction Reaction

Mingjie Liu<sup>†\*</sup>, Huolin Xin<sup>†</sup>, Qin Wu<sup>†\*</sup>

<sup>†</sup> Center for Functional Nanomaterials, Brookhaven National Laboratory, Upton, NY, 11973

\* Email: mliu@bnl.gov, qinwu@bnl.gov

S1. Phase diagram of Pt-alloy:

The phase diagram of Pt-M alloy for M=V, Cr, Fe, Co, Ni and Cu are from *FactSage*. The stability of the intermetallic Pt-M alloy can be estimated by their thermodynamic states with temperature and composition. Under equilibrium condition, the intermetallic phase of Pt<sub>0.5</sub>-M<sub>0.5</sub> is stable below certain temperature, indicating by the double dome structure.

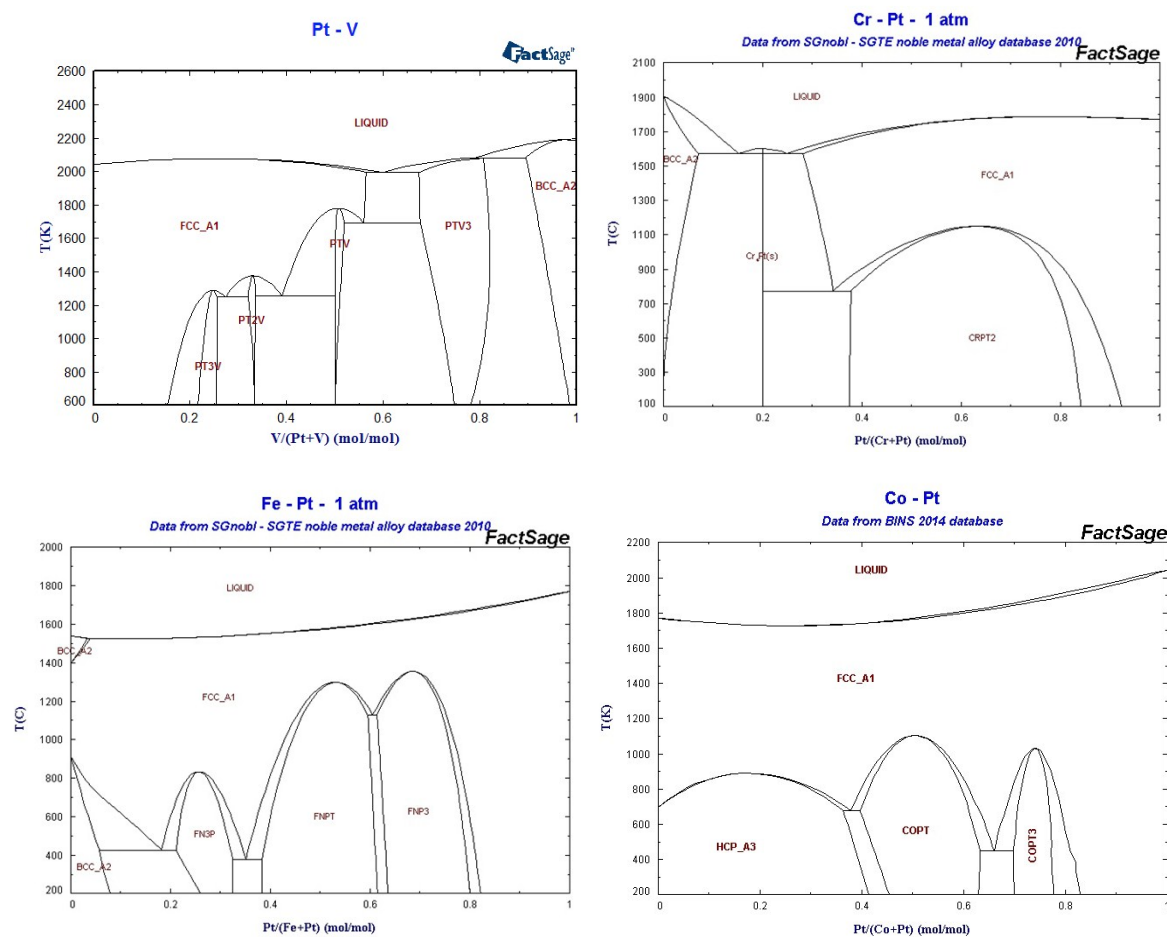

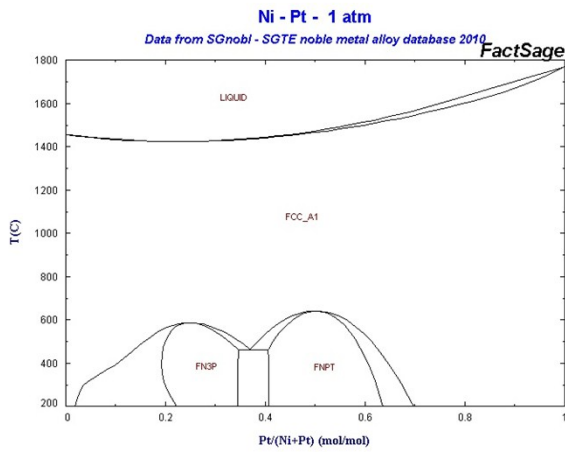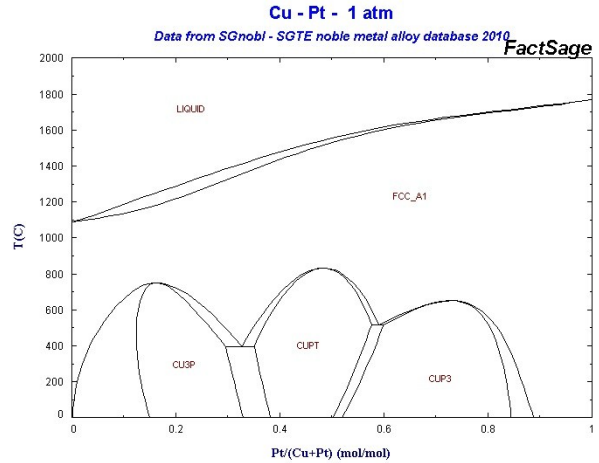

S2. Most stable structures of O\*, OH\* and OOH\* on Pt/fct-PtM:

Using one, two and three layers of Pt on top of Pt-Fe as an example, the most stable structures for O\*, OH\* and OOH\* adsorption: (we doubled the unit cell to (4x4) supercell for the illustration, shown with top and side views)

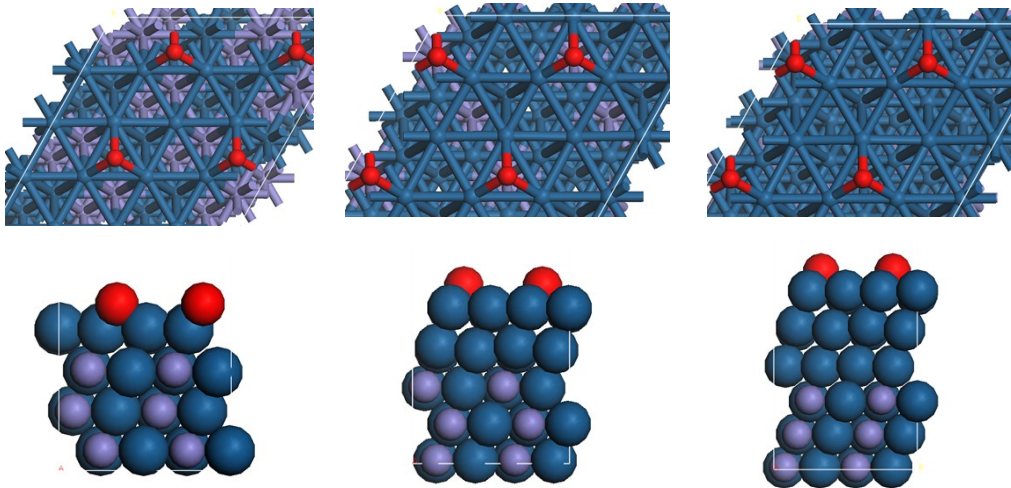

Most stable O\* on 1, 2 and 3-Pt layers on fct-PtFe

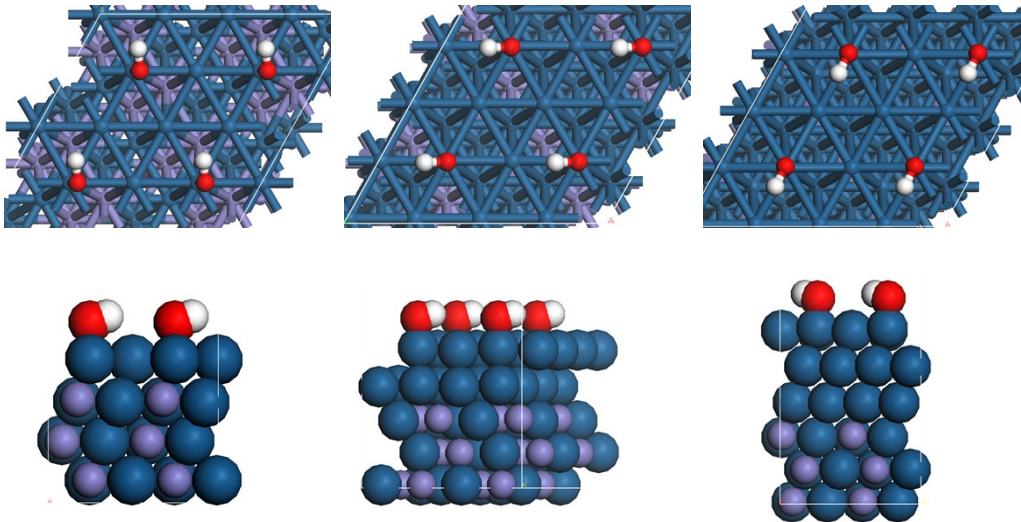

Most stable OH\* on 1, 2 and 3-Pt layers on fct-PtFe

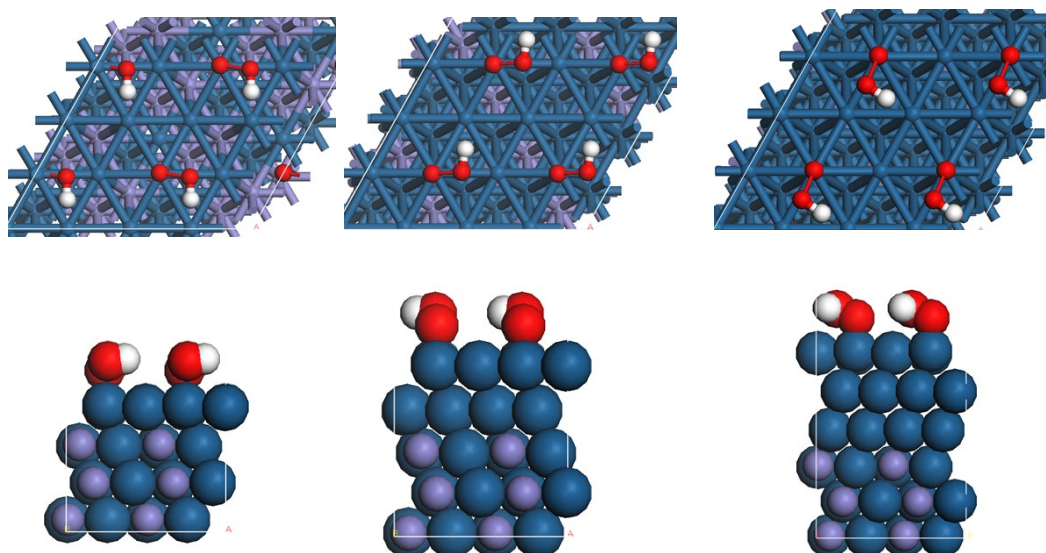

Most stable OOH\* on 1, 2 and 3-Pt layers on fct-PtFe

S3. Fractional coordinates for relaxed (111) facet of fct Pt-M (3 layers) with 1, 2 and 3 layers of Pt:

3+1: 3 layers of Pt-M and 1 layer Pt skin

3+2: 3 layers of Pt-M and 2 layers Pt skin

3+3: 3 layers of Pt-M and 3 layers Pt skin

a (Å) b (Å) c (Å)  $\alpha$  (°)  $\beta$  (°)  $\gamma$  (°)

Pt-V:

3+1:

|      |          |          |           |           |           |           |
|------|----------|----------|-----------|-----------|-----------|-----------|
|      | 5.472054 | 5.472054 | 25.000017 | 90.000000 | 90.000000 | 59.314232 |
| V1   | 0.013678 | 0.513678 | 0.022619  |           |           |           |
| V2   | 0.685705 | 0.185705 | 0.106455  |           |           |           |
| V3   | 0.363577 | 0.863577 | 0.204267  |           |           |           |
| V4   | 0.513678 | 0.013678 | 0.022619  |           |           |           |
| V5   | 0.185715 | 0.685715 | 0.106461  |           |           |           |
| V6   | 0.863576 | 0.363576 | 0.204268  |           |           |           |
| Pt1  | 0.019594 | 0.519594 | 0.291099  |           |           |           |
| Pt2  | 0.519596 | 0.019596 | 0.291099  |           |           |           |
| Pt3  | 0.013678 | 0.013678 | 0.022619  |           |           |           |
| Pt4  | 0.686861 | 0.686870 | 0.111646  |           |           |           |
| Pt5  | 0.368831 | 0.368836 | 0.193293  |           |           |           |
| Pt6  | 0.023959 | 0.023947 | 0.289820  |           |           |           |
| Pt7  | 0.513678 | 0.513678 | 0.022619  |           |           |           |
| Pt8  | 0.186870 | 0.186861 | 0.111646  |           |           |           |
| Pt9  | 0.868836 | 0.868831 | 0.193293  |           |           |           |
| Pt10 | 0.523947 | 0.523959 | 0.289820  |           |           |           |

3+2

|    |          |          |           |           |           |           |
|----|----------|----------|-----------|-----------|-----------|-----------|
|    | 5.472054 | 5.472054 | 25.000017 | 90.000000 | 90.000000 | 59.314232 |
| V1 | 0.351571 | 0.851571 | 0.022202  |           |           |           |

|      |          |          |          |
|------|----------|----------|----------|
| V2   | 0.022399 | 0.522399 | 0.105608 |
| V3   | 0.698556 | 0.198556 | 0.202191 |
| V4   | 0.851571 | 0.351571 | 0.022202 |
| V5   | 0.522441 | 0.022441 | 0.105616 |
| V6   | 0.198556 | 0.698556 | 0.202193 |
| Pt1  | 0.353627 | 0.853627 | 0.287919 |
| Pt2  | 0.009091 | 0.509091 | 0.385952 |
| Pt3  | 0.853629 | 0.353629 | 0.287921 |
| Pt4  | 0.509088 | 0.009088 | 0.385954 |
| Pt5  | 0.351571 | 0.351571 | 0.022202 |
| Pt6  | 0.025369 | 0.025359 | 0.110991 |
| Pt7  | 0.704515 | 0.704516 | 0.194021 |
| Pt8  | 0.354616 | 0.354614 | 0.286785 |
| Pt9  | 0.008726 | 0.008727 | 0.384014 |
| Pt10 | 0.851571 | 0.851571 | 0.022202 |
| Pt11 | 0.525359 | 0.525369 | 0.110991 |
| Pt12 | 0.204516 | 0.204515 | 0.194021 |
| Pt13 | 0.854614 | 0.854616 | 0.286785 |
| Pt14 | 0.508727 | 0.508726 | 0.384014 |

3+3

5.472054 5.472054 27.000046 90.000000 90.000000 59.314232

|      |          |          |          |
|------|----------|----------|----------|
| V1   | 0.689464 | 0.189464 | 0.021949 |
| V2   | 0.361741 | 0.861742 | 0.099796 |
| V3   | 0.035083 | 0.535116 | 0.188511 |
| V4   | 0.189464 | 0.689464 | 0.021949 |
| V5   | 0.861718 | 0.361730 | 0.099792 |
| V6   | 0.535098 | 0.035083 | 0.188508 |
| Pt1  | 0.691727 | 0.191768 | 0.269028 |
| Pt2  | 0.352621 | 0.852600 | 0.358681 |
| Pt3  | 0.016842 | 0.516834 | 0.447667 |
| Pt4  | 0.191760 | 0.691726 | 0.269029 |
| Pt5  | 0.852600 | 0.352610 | 0.358681 |
| Pt6  | 0.516841 | 0.016835 | 0.447667 |
| Pt7  | 0.689464 | 0.689464 | 0.021949 |
| Pt8  | 0.363304 | 0.363319 | 0.104020 |
| Pt9  | 0.041556 | 0.041577 | 0.180948 |
| Pt10 | 0.694738 | 0.694742 | 0.268196 |
| Pt11 | 0.352994 | 0.352992 | 0.358212 |
| Pt12 | 0.015987 | 0.015981 | 0.448235 |
| Pt13 | 0.189464 | 0.189464 | 0.021949 |
| Pt14 | 0.863293 | 0.863310 | 0.104013 |
| Pt15 | 0.541596 | 0.541597 | 0.180949 |
| Pt16 | 0.194733 | 0.194736 | 0.268191 |
| Pt17 | 0.852995 | 0.852988 | 0.358215 |
| Pt18 | 0.515989 | 0.515979 | 0.448236 |

Pt-Cr

3+1

5.395720 5.395720 24.999983 90.000000 90.000000 59.441555

|      |          |          |          |
|------|----------|----------|----------|
| Cr1  | 0.011160 | 0.511160 | 0.022595 |
| Cr2  | 0.694569 | 0.194568 | 0.110169 |
| Cr3  | 0.376863 | 0.876881 | 0.203622 |
| Cr4  | 0.511160 | 0.011160 | 0.022595 |
| Cr5  | 0.194578 | 0.694555 | 0.110171 |
| Cr6  | 0.876876 | 0.376878 | 0.203622 |
| Pt1  | 0.048663 | 0.548739 | 0.295227 |
| Pt2  | 0.548683 | 0.048709 | 0.295227 |
| Pt3  | 0.011160 | 0.011160 | 0.022595 |
| Pt4  | 0.692440 | 0.692440 | 0.114183 |
| Pt5  | 0.380034 | 0.380098 | 0.197463 |
| Pt6  | 0.050930 | 0.050964 | 0.292782 |
| Pt7  | 0.511160 | 0.511160 | 0.022595 |
| Pt8  | 0.192409 | 0.192417 | 0.114186 |
| Pt9  | 0.880089 | 0.880030 | 0.197474 |
| Pt10 | 0.550893 | 0.550952 | 0.292741 |

3+2:

|          |          |           |           |           |           |
|----------|----------|-----------|-----------|-----------|-----------|
| 5.395720 | 5.395720 | 25.000011 | 90.000000 | 90.000000 | 59.441555 |
| Cr1      | 0.348213 | 0.848213  | 0.022163  |           |           |
| Cr2      | 0.026877 | 0.526877  | 0.108584  |           |           |
| Cr3      | 0.705164 | 0.205164  | 0.203653  |           |           |
| Cr4      | 0.848213 | 0.348213  | 0.022163  |           |           |
| Cr5      | 0.526883 | 0.026883  | 0.108587  |           |           |
| Cr6      | 0.205175 | 0.705175  | 0.203655  |           |           |
| Pt1      | 0.368582 | 0.868582  | 0.291437  |           |           |
| Pt2      | 0.024827 | 0.524827  | 0.389475  |           |           |
| Pt3      | 0.868583 | 0.368583  | 0.291435  |           |           |
| Pt4      | 0.524825 | 0.024825  | 0.389479  |           |           |
| Pt5      | 0.348213 | 0.348213  | 0.022163  |           |           |
| Pt6      | 0.025952 | 0.025910  | 0.113943  |           |           |
| Pt7      | 0.711140 | 0.711154  | 0.196534  |           |           |
| Pt8      | 0.369525 | 0.369531  | 0.289544  |           |           |
| Pt9      | 0.024235 | 0.024236  | 0.388210  |           |           |
| Pt10     | 0.848213 | 0.848213  | 0.022163  |           |           |
| Pt11     | 0.525910 | 0.525952  | 0.113943  |           |           |
| Pt12     | 0.211154 | 0.211140  | 0.196534  |           |           |
| Pt13     | 0.869531 | 0.869525  | 0.289544  |           |           |
| Pt14     | 0.524236 | 0.524235  | 0.388210  |           |           |

3+3:

|          |          |           |           |           |           |
|----------|----------|-----------|-----------|-----------|-----------|
| 5.395720 | 5.395720 | 27.000038 | 90.000000 | 90.000000 | 59.441555 |
| Cr1      | 0.685267 | 0.185267  | 0.021915  |           |           |
| Cr2      | 0.367620 | 0.867053  | 0.102573  |           |           |
| Cr3      | 0.047280 | 0.546264  | 0.189469  |           |           |
| Cr4      | 0.185267 | 0.685267  | 0.021915  |           |           |
| Cr5      | 0.867644 | 0.367083  | 0.102582  |           |           |
| Cr6      | 0.547243 | 0.046256  | 0.189452  |           |           |
| Pt1      | 0.715210 | 0.213468  | 0.272857  |           |           |

|      |          |          |          |
|------|----------|----------|----------|
| Pt2  | 0.370991 | 0.867172 | 0.362724 |
| Pt3  | 0.022606 | 0.519664 | 0.452560 |
| Pt4  | 0.215224 | 0.713446 | 0.272848 |
| Pt5  | 0.870944 | 0.367136 | 0.362656 |
| Pt6  | 0.522619 | 0.019659 | 0.452729 |
| Pt7  | 0.685267 | 0.685267 | 0.021915 |
| Pt8  | 0.366242 | 0.365589 | 0.106614 |
| Pt9  | 0.051453 | 0.050630 | 0.183945 |
| Pt10 | 0.716995 | 0.715207 | 0.270351 |
| Pt11 | 0.371236 | 0.367414 | 0.362199 |
| Pt12 | 0.022183 | 0.019267 | 0.453718 |
| Pt13 | 0.185267 | 0.185267 | 0.021915 |
| Pt14 | 0.866280 | 0.865603 | 0.106621 |
| Pt15 | 0.551489 | 0.550608 | 0.183948 |
| Pt16 | 0.216993 | 0.215190 | 0.270354 |
| Pt17 | 0.871238 | 0.867366 | 0.362163 |
| Pt18 | 0.522172 | 0.519279 | 0.453828 |

Pt-Fe:

3+1:

5.400027 5.400027 24.999956 90.000000 90.000000 60.770180

|      |          |          |          |
|------|----------|----------|----------|
| Fe1  | 0.984296 | 0.484296 | 0.000000 |
| Fe2  | 0.661045 | 0.161045 | 0.085246 |
| Fe3  | 0.339928 | 0.839928 | 0.178829 |
| Fe4  | 0.484296 | 0.984296 | 0.000000 |
| Fe5  | 0.161051 | 0.661051 | 0.085245 |
| Fe6  | 0.839927 | 0.339927 | 0.178828 |
| Pt1  | 0.002362 | 0.502362 | 0.268696 |
| Pt2  | 0.502363 | 0.002363 | 0.268696 |
| Pt3  | 0.984296 | 0.984296 | 0.000000 |
| Pt4  | 0.661242 | 0.661241 | 0.087794 |
| Pt5  | 0.341583 | 0.341584 | 0.172123 |
| Pt6  | 0.004803 | 0.004803 | 0.266750 |
| Pt7  | 0.484296 | 0.484296 | 0.000000 |
| Pt8  | 0.161241 | 0.161242 | 0.087794 |
| Pt9  | 0.841584 | 0.841583 | 0.172123 |
| Pt10 | 0.504803 | 0.504803 | 0.266750 |

3+2:

5.400027 5.400027 25.000042 90.000000 90.000000 60.770180

|     |          |          |          |
|-----|----------|----------|----------|
| Fe1 | 0.312395 | 0.812395 | 0.008160 |
| Fe2 | 0.989657 | 0.489657 | 0.093537 |
| Fe3 | 0.667616 | 0.167616 | 0.185843 |
| Fe4 | 0.812395 | 0.312395 | 0.008160 |
| Fe5 | 0.489675 | 0.989675 | 0.093536 |
| Fe6 | 0.167620 | 0.667620 | 0.185841 |
| Pt1 | 0.330892 | 0.830892 | 0.274828 |
| Pt2 | 0.989725 | 0.489725 | 0.373336 |
| Pt3 | 0.830894 | 0.330894 | 0.274829 |
| Pt4 | 0.489724 | 0.989724 | 0.373332 |

|      |          |          |          |
|------|----------|----------|----------|
| Pt5  | 0.312395 | 0.312395 | 0.008160 |
| Pt6  | 0.990507 | 0.990510 | 0.096117 |
| Pt7  | 0.670563 | 0.670563 | 0.181161 |
| Pt8  | 0.330983 | 0.331003 | 0.273128 |
| Pt9  | 0.988764 | 0.988760 | 0.370195 |
| Pt10 | 0.812395 | 0.812395 | 0.008160 |
| Pt11 | 0.490510 | 0.490507 | 0.096117 |
| Pt12 | 0.170563 | 0.170563 | 0.181161 |
| Pt13 | 0.831003 | 0.830983 | 0.273128 |
| Pt14 | 0.488760 | 0.488764 | 0.370195 |

3+3:

|      |          |          |           |           |           |           |
|------|----------|----------|-----------|-----------|-----------|-----------|
|      | 5.400027 | 5.400027 | 27.000027 | 90.000000 | 90.000000 | 60.770180 |
| Fe1  | 0.640494 | 0.140494 | 0.005476  |           |           |           |
| Fe2  | 0.319334 | 0.819334 | 0.085070  |           |           |           |
| Fe3  | 0.994118 | 0.494118 | 0.169595  |           |           |           |
| Fe4  | 0.140494 | 0.640494 | 0.005476  |           |           |           |
| Fe5  | 0.819333 | 0.319333 | 0.085071  |           |           |           |
| Fe6  | 0.494117 | 0.994117 | 0.169595  |           |           |           |
| Pt1  | 0.659398 | 0.159398 | 0.253446  |           |           |           |
| Pt2  | 0.325894 | 0.825894 | 0.342512  |           |           |           |
| Pt3  | 0.993621 | 0.493621 | 0.431398  |           |           |           |
| Pt4  | 0.159402 | 0.659402 | 0.253447  |           |           |           |
| Pt5  | 0.825893 | 0.325893 | 0.342513  |           |           |           |
| Pt6  | 0.493621 | 0.993621 | 0.431398  |           |           |           |
| Pt7  | 0.640494 | 0.640494 | 0.005476  |           |           |           |
| Pt8  | 0.319719 | 0.319728 | 0.086453  |           |           |           |
| Pt9  | 0.996513 | 0.996514 | 0.165968  |           |           |           |
| Pt10 | 0.661189 | 0.661190 | 0.251006  |           |           |           |
| Pt11 | 0.326086 | 0.326086 | 0.341746  |           |           |           |
| Pt12 | 0.993123 | 0.993124 | 0.432599  |           |           |           |
| Pt13 | 0.140494 | 0.140494 | 0.005476  |           |           |           |
| Pt14 | 0.819728 | 0.819718 | 0.086453  |           |           |           |
| Pt15 | 0.496514 | 0.496513 | 0.165968  |           |           |           |
| Pt16 | 0.161190 | 0.161189 | 0.251006  |           |           |           |
| Pt17 | 0.826086 | 0.826086 | 0.341746  |           |           |           |
| Pt18 | 0.493124 | 0.493123 | 0.432599  |           |           |           |

Pt-Co:

3+1:

|     |          |          |           |           |           |           |
|-----|----------|----------|-----------|-----------|-----------|-----------|
|     | 5.334154 | 5.334154 | 24.999969 | 90.000000 | 90.000000 | 60.797485 |
| Co1 | 0.983733 | 0.483733 | 0.008402  |           |           |           |
| Co2 | 0.657099 | 0.157099 | 0.093679  |           |           |           |
| Co3 | 0.331213 | 0.831213 | 0.183658  |           |           |           |
| Co4 | 0.483733 | 0.983733 | 0.008402  |           |           |           |
| Co5 | 0.157100 | 0.657100 | 0.093679  |           |           |           |
| Co6 | 0.831213 | 0.331213 | 0.183658  |           |           |           |
| Pt1 | 0.995377 | 0.495377 | 0.274721  |           |           |           |
| Pt2 | 0.495377 | 0.995377 | 0.274721  |           |           |           |
| Pt3 | 0.983733 | 0.983733 | 0.008402  |           |           |           |

|      |          |          |          |
|------|----------|----------|----------|
| Pt4  | 0.657558 | 0.657558 | 0.095261 |
| Pt5  | 0.334692 | 0.334690 | 0.178967 |
| Pt6  | 0.997305 | 0.997305 | 0.272670 |
| Pt7  | 0.483733 | 0.483733 | 0.008402 |
| Pt8  | 0.157558 | 0.157558 | 0.095261 |
| Pt9  | 0.834690 | 0.834692 | 0.178967 |
| Pt10 | 0.497305 | 0.497305 | 0.272670 |

3+2:

|          |          |           |           |           |           |
|----------|----------|-----------|-----------|-----------|-----------|
| 5.334154 | 5.334154 | 25.000027 | 90.000000 | 90.000000 | 60.797485 |
| Co1      | 0.311644 | 0.811644  | 0.006871  |           |           |
| Co2      | 0.983218 | 0.483218  | 0.091138  |           |           |
| Co3      | 0.659240 | 0.159240  | 0.182463  |           |           |
| Co4      | 0.811644 | 0.311644  | 0.006871  |           |           |
| Co5      | 0.483214 | 0.983214  | 0.091137  |           |           |
| Co6      | 0.159242 | 0.659242  | 0.182464  |           |           |
| Pt1      | 0.323301 | 0.823301  | 0.271816  |           |           |
| Pt2      | 0.980643 | 0.480643  | 0.370831  |           |           |
| Pt3      | 0.823302 | 0.323302  | 0.271818  |           |           |
| Pt4      | 0.480640 | 0.980640  | 0.370828  |           |           |
| Pt5      | 0.311644 | 0.311644  | 0.006871  |           |           |
| Pt6      | 0.984105 | 0.984089  | 0.094045  |           |           |
| Pt7      | 0.664620 | 0.664636  | 0.177478  |           |           |
| Pt8      | 0.324020 | 0.324036  | 0.270225  |           |           |
| Pt9      | 0.980105 | 0.980106  | 0.368464  |           |           |
| Pt10     | 0.811644 | 0.811644  | 0.006871  |           |           |
| Pt11     | 0.484089 | 0.484105  | 0.094045  |           |           |
| Pt12     | 0.164636 | 0.164620  | 0.177478  |           |           |
| Pt13     | 0.824036 | 0.824020  | 0.270225  |           |           |
| Pt14     | 0.480106 | 0.480105  | 0.368464  |           |           |

3+3:

|          |          |           |           |           |           |
|----------|----------|-----------|-----------|-----------|-----------|
| 5.334154 | 5.334154 | 26.999983 | 90.000000 | 90.000000 | 60.797485 |
| Co1      | 0.639555 | 0.139555  | 0.007725  |           |           |
| Co2      | 0.310680 | 0.810680  | 0.085750  |           |           |
| Co3      | 0.989211 | 0.489211  | 0.170837  |           |           |
| Co4      | 0.139555 | 0.639555  | 0.007725  |           |           |
| Co5      | 0.810689 | 0.310688  | 0.085752  |           |           |
| Co6      | 0.489213 | 0.989212  | 0.170838  |           |           |
| Pt1      | 0.654518 | 0.154517  | 0.254129  |           |           |
| Pt2      | 0.317144 | 0.817149  | 0.343852  |           |           |
| Pt3      | 0.978075 | 0.478075  | 0.433579  |           |           |
| Pt4      | 0.154518 | 0.654517  | 0.254127  |           |           |
| Pt5      | 0.817147 | 0.317151  | 0.343852  |           |           |
| Pt6      | 0.478078 | 0.978077  | 0.433578  |           |           |
| Pt7      | 0.639555 | 0.639555  | 0.007725  |           |           |
| Pt8      | 0.312013 | 0.312030  | 0.088556  |           |           |
| Pt9      | 0.992787 | 0.992756  | 0.165790  |           |           |
| Pt10     | 0.655560 | 0.655556  | 0.251819  |           |           |
| Pt11     | 0.317640 | 0.317648  | 0.343834  |           |           |



|      |          |          |          |
|------|----------|----------|----------|
| Pt12 | 0.978017 | 0.978020 | 0.436065 |
| Pt13 | 0.139555 | 0.139555 | 0.007725 |
| Pt14 | 0.812031 | 0.812012 | 0.088556 |
| Pt15 | 0.492757 | 0.492787 | 0.165790 |
| Pt16 | 0.155556 | 0.155560 | 0.251819 |
| Pt17 | 0.817646 | 0.817640 | 0.343834 |
| Pt18 | 0.478020 | 0.478017 | 0.436064 |

Pt-Ni:

3+1:

|          |          |           |           |           |           |
|----------|----------|-----------|-----------|-----------|-----------|
| 5.295301 | 5.295301 | 24.999975 | 90.000000 | 90.000000 | 61.940582 |
| Ni1      | 0.959721 | 0.459721  | 0.005588  |           |           |
| Ni2      | 0.642997 | 0.142997  | 0.091617  |           |           |
| Ni3      | 0.322410 | 0.822410  | 0.178672  |           |           |
| Ni4      | 0.459721 | 0.959721  | 0.005588  |           |           |
| Ni5      | 0.142997 | 0.642997  | 0.091617  |           |           |
| Ni6      | 0.822411 | 0.322411  | 0.178671  |           |           |
| Pt1      | 0.997310 | 0.497310  | 0.272126  |           |           |
| Pt2      | 0.497310 | 0.997310  | 0.272128  |           |           |
| Pt3      | 0.959721 | 0.959721  | 0.005588  |           |           |
| Pt4      | 0.642819 | 0.642819  | 0.092131  |           |           |
| Pt5      | 0.324579 | 0.324579  | 0.176606  |           |           |
| Pt6      | 0.998843 | 0.998843  | 0.268330  |           |           |
| Pt7      | 0.459721 | 0.459721  | 0.005588  |           |           |
| Pt8      | 0.142819 | 0.142819  | 0.092131  |           |           |
| Pt9      | 0.824579 | 0.824579  | 0.176606  |           |           |
| Pt10     | 0.498843 | 0.498843  | 0.268330  |           |           |

3+2:

|          |          |           |           |           |           |
|----------|----------|-----------|-----------|-----------|-----------|
| 5.295301 | 5.295301 | 25.000002 | 90.000000 | 90.000000 | 61.940582 |
| Ni1      | 0.279628 | 0.779628  | 0.005361  |           |           |
| Ni2      | 0.964556 | 0.464555  | 0.091196  |           |           |
| Ni3      | 0.645009 | 0.145009  | 0.179191  |           |           |
| Ni4      | 0.779628 | 0.279628  | 0.005361  |           |           |
| Ni5      | 0.464562 | 0.964562  | 0.091198  |           |           |
| Ni6      | 0.145005 | 0.645005  | 0.179191  |           |           |
| Pt1      | 0.313448 | 0.813448  | 0.270411  |           |           |
| Pt2      | 0.975329 | 0.475329  | 0.369784  |           |           |
| Pt3      | 0.813451 | 0.313451  | 0.270410  |           |           |
| Pt4      | 0.475307 | 0.975307  | 0.369785  |           |           |
| Pt5      | 0.279628 | 0.279628  | 0.005361  |           |           |
| Pt6      | 0.964076 | 0.964067  | 0.092318  |           |           |
| Pt7      | 0.648051 | 0.648043  | 0.176496  |           |           |
| Pt8      | 0.314155 | 0.314165  | 0.268454  |           |           |
| Pt9      | 0.974619 | 0.974589  | 0.366515  |           |           |
| Pt10     | 0.779628 | 0.779628  | 0.005361  |           |           |
| Pt11     | 0.464067 | 0.464076  | 0.092318  |           |           |
| Pt12     | 0.148043 | 0.148051  | 0.176496  |           |           |
| Pt13     | 0.814165 | 0.814155  | 0.268454  |           |           |
| Pt14     | 0.474589 | 0.474619  | 0.366515  |           |           |

3+3:

5.295301 5.295301 27.000027 90.000000 90.000000 61.940582  
Ni1 0.599535 0.099535 0.005477  
Ni2 0.283898 0.783898 0.084766  
Ni3 0.965768 0.465768 0.166414  
Ni4 0.099535 0.599535 0.005477  
Ni5 0.783898 0.283898 0.084764  
Ni6 0.465760 0.965760 0.166414  
Pt1 0.638981 0.138981 0.251882  
Pt2 0.309679 0.809679 0.343083  
Pt3 0.997529 0.497529 0.430218  
Pt4 0.138982 0.638982 0.251883  
Pt5 0.809679 0.309679 0.343083  
Pt6 0.497529 0.997529 0.430219  
Pt7 0.599535 0.599535 0.005477  
Pt8 0.283800 0.283803 0.085907  
Pt9 0.968170 0.968170 0.164119  
Pt10 0.639903 0.639901 0.249067  
Pt11 0.310371 0.310371 0.340356  
Pt12 0.997270 0.997270 0.436419  
Pt13 0.099535 0.099535 0.005477  
Pt14 0.783803 0.783800 0.085907  
Pt15 0.468170 0.468170 0.164119  
Pt16 0.139901 0.139903 0.249067  
Pt17 0.810371 0.810371 0.340356  
Pt18 0.497270 0.497270 0.436419

Pt-Cu:

3+1:

5.336905 5.336905 25.000038 90.000000 90.000000 62.847446  
Cu1 0.940071 0.440071 0.022271  
Cu2 0.615228 0.115227 0.108871  
Cu3 0.294233 0.794233 0.198688  
Cu4 0.440071 0.940071 0.022271  
Cu5 0.115227 0.615227 0.108872  
Cu6 0.794233 0.294233 0.198688  
Pt1 0.960045 0.460045 0.289561  
Pt2 0.460046 0.960045 0.289561  
Pt3 0.940071 0.940071 0.022271  
Pt4 0.614992 0.614991 0.110689  
Pt5 0.295597 0.295596 0.195658  
Pt6 0.960911 0.960911 0.288204  
Pt7 0.440071 0.440071 0.022271  
Pt8 0.114991 0.114992 0.110689  
Pt9 0.795596 0.795597 0.195658  
Pt10 0.460912 0.460910 0.288204

3+2:

5.336905 5.336905 24.999985 90.000000 90.000000 62.847446

|      |          |          |          |
|------|----------|----------|----------|
| Cu1  | 0.253429 | 0.753428 | 0.022091 |
| Cu2  | 0.928553 | 0.428552 | 0.109371 |
| Cu3  | 0.607020 | 0.107019 | 0.198688 |
| Cu4  | 0.753429 | 0.253428 | 0.022091 |
| Cu5  | 0.428554 | 0.928553 | 0.109370 |
| Cu6  | 0.107020 | 0.607020 | 0.198688 |
| Pt1  | 0.279988 | 0.779988 | 0.289302 |
| Pt2  | 0.949160 | 0.449160 | 0.388947 |
| Pt3  | 0.779988 | 0.279988 | 0.289302 |
| Pt4  | 0.449160 | 0.949160 | 0.388947 |
| Pt5  | 0.253429 | 0.253428 | 0.022091 |
| Pt6  | 0.928044 | 0.928044 | 0.110778 |
| Pt7  | 0.609321 | 0.609320 | 0.196409 |
| Pt8  | 0.279781 | 0.279781 | 0.288535 |
| Pt9  | 0.948329 | 0.948330 | 0.384379 |
| Pt10 | 0.753429 | 0.753428 | 0.022091 |
| Pt11 | 0.428044 | 0.428043 | 0.110778 |
| Pt12 | 0.109321 | 0.109321 | 0.196409 |
| Pt13 | 0.779781 | 0.779781 | 0.288535 |
| Pt14 | 0.448330 | 0.448329 | 0.384379 |

3+3:

|          |          |           |           |           |           |
|----------|----------|-----------|-----------|-----------|-----------|
| 5.336905 | 5.336905 | 27.000032 | 90.000000 | 90.000000 | 62.847446 |
| Cu1      | 0.566786 | 0.066785  | 0.022033  |           |           |
| Cu2      | 0.241103 | 0.741102  | 0.102278  |           |           |
| Cu3      | 0.919951 | 0.419951  | 0.185616  |           |           |
| Cu4      | 0.066786 | 0.566785  | 0.022033  |           |           |
| Cu5      | 0.741103 | 0.241103  | 0.102278  |           |           |
| Cu6      | 0.419953 | 0.919950  | 0.185616  |           |           |
| Pt1      | 0.594954 | 0.094953  | 0.268058  |           |           |
| Pt2      | 0.295949 | 0.795950  | 0.361118  |           |           |
| Pt3      | 0.001537 | 0.501538  | 0.446306  |           |           |
| Pt4      | 0.094953 | 0.594953  | 0.268058  |           |           |
| Pt5      | 0.795949 | 0.295949  | 0.361118  |           |           |
| Pt6      | 0.501537 | 0.001538  | 0.446306  |           |           |
| Pt7      | 0.566786 | 0.566785  | 0.022033  |           |           |
| Pt8      | 0.240795 | 0.240795  | 0.104004  |           |           |
| Pt9      | 0.922694 | 0.922692  | 0.182898  |           |           |
| Pt10     | 0.595156 | 0.595155  | 0.269773  |           |           |
| Pt11     | 0.296674 | 0.296675  | 0.356635  |           |           |
| Pt12     | 0.000974 | 0.000974  | 0.452359  |           |           |
| Pt13     | 0.066786 | 0.066785  | 0.022033  |           |           |
| Pt14     | 0.740797 | 0.740794  | 0.104004  |           |           |
| Pt15     | 0.422693 | 0.422691  | 0.182898  |           |           |
| Pt16     | 0.095156 | 0.095155  | 0.269773  |           |           |
| Pt17     | 0.796674 | 0.796675  | 0.356635  |           |           |
| Pt18     | 0.500974 | 0.500974  | 0.452359  |           |           |

S4. Ligand, shear and normal strain decomposition:

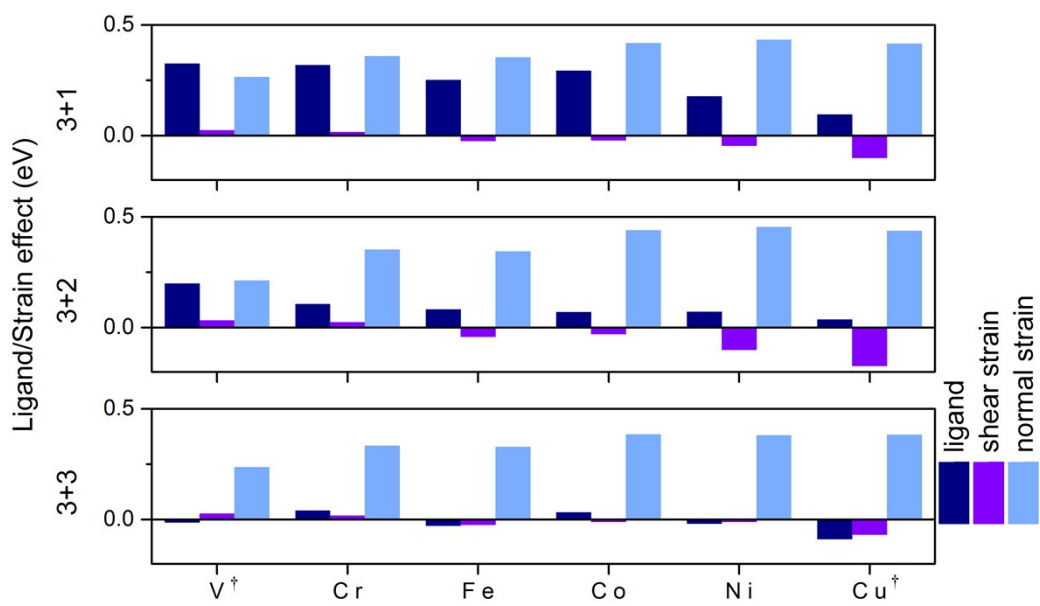

Supplement: c8cp06756b1.pdf [file c8cp06756b1.pdf]
